## A three-protein signature and clinical outcome in esophageal squamous cell carcinoma

Hui-Hui Cao<sup>1,2,6,\*</sup>, Shi-Yi Zhang<sup>3,\*</sup>, Jin-Hui Shen<sup>4,\*</sup>, Zhi-Yong Wu<sup>3</sup>, Jian-Yi Wu<sup>1,5</sup>, Shao-Hong Wang<sup>4</sup>, En-Min Li<sup>1,5</sup> and Li-Yan Xu<sup>1,2</sup>

<sup>1</sup> The Key Laboratory of Molecular Biology for High Cancer Incidence Coastal Chaoshan Area, Shantou University Medical College, Shantou, Guangdong, P.R. China

<sup>2</sup> Institute of Oncologic Pathology, Shantou University Medical College, Shantou, Guangdong, P.R. China

<sup>3</sup> Departments of Oncology Surgery, Shantou Central Hospital, Affiliated Shantou Hospital of Sun Yat-sen University, Shantou, Guangdong, P.R. China

<sup>4</sup> Departments of Pathology, Shantou Central Hospital, Affiliated Shantou Hospital of Sun Yat-sen University, Shantou, Guangdong, P.R. China

<sup>5</sup> Department of Biochemistry and Molecular Biology, Shantou University Medical College, Shantou, Guangdong, P.R. China

<sup>6</sup> Departments of Pathology, Zhuhai People's Hospital, Zhuhai, Guangdong, P.R. China

\* These authors contributed equally to this work

**Correspondence to:** En-Min Li, **email:** nml@stu.edu.cn

Li-Yan Xu, **email:** lyxu@stu.edu.cn

**Keywords:** ESCC, Kindlin-2, Myosin-9, three-protein signature, prognosis

**Received:** September 30, 2014

**Accepted:** December 28, 2014

**Published:** December 31, 2014

This is an open-access article distributed under the terms of the Creative Commons Attribution License, which permits unrestricted use, distribution, and reproduction in any medium, provided the original author and source are credited.

### ABSTRACT

**Current staging is inadequate to precisely predict clinical outcome of esophageal squamous cell carcinoma (ESCC) and determine treatment choices, which vary from operation alone to intensive multimodal regimens. The purpose of this study is to investigate the prognostic values of an immunohistochemistry-based three-protein signature model in patients with ESCC. We determined the protein expression of Annexin II, cofilin 1, ezrin, fascin, kindlin-2, moesin, MTSS1, myosin-9, profilin-1, Rac1, radixin, ROCK2, talin, tensin and villin 1 in a test cohort including 110 formalin-fixed, paraffin-embedded esophageal curative resection specimens by tissue microarrays (TMAs). A three-protein signature elicited from the protein cluster, Annexin II, kindlin-2, and myosin-9, was validated by TMAs on an independent cohort of 147 specimens. The expression of three-protein signature was highly predictive of ESCC overall survival (OS) and disease-free survival (DFS) in both generation and validation datasets. Regression analysis shows that this three-protein signature is an independent predictor for OS and DFS. Furthermore, the predictive ability of these 3 biomarkers in combination is more robust than that of each individual biomarker. This study demonstrates a clinically applicable prognostic model that accurately predicts ESCC patient survival and/or tumor recurrence, and thus could serve as a complement to current risk stratification approaches.**

### INTRODUCTION

Esophageal squamous cell carcinoma (ESCC) still remains the most common cancer-induced mortality in China, in particular in areas nearby the Taihang Mountain range and Coastal Chaoshan [1]. Since treatment choices vary from operation alone to intensive

multimodal regimens, staging is critical for determination of therapeutic modality, but current markers remain inadequate to precisely predict clinical outcome of ESCC. Therefore, identifying patients at high risk and improving the overall prognosis of the disease are urgent needs for the current clinical management of ESCC [2].

Gene-expression profiling is useful for identifying

**Table 1: Primary antibodies used in this study**

| Antibody   | Manufacturer | Catalog NO. | Species                    | Working Concentration | Staining Pattern       |
|------------|--------------|-------------|----------------------------|-----------------------|------------------------|
| Annexin II | Santa Cruz   | sc-9016     | Rabbit Polyclonal Antibody | 1:100                 | membrane and cytoplasm |
| cofilin 1  | PTGlab       | 10960-1-AP  | Rabbit Polyclonal Antibody | 1:50                  | cytoplasm              |
| ezrin      | Neomarkers   | MS-661      | Mouse Monoclonal Antibody  | 1:100                 | cytoplasm              |
| fascin     | DAKO         | M3567       | Mouse Monoclonal Antibody  | 1:100                 | cytoplasm              |
| kindlin-2  | Origene      | TA500505    | Mouse Monoclonal Antibody  | 1:50                  | cytoplasm and nucleus  |
| moesin     | Abcam        | Ab52490     | Rabbit Monoclonal Antibody | 1:200                 | cytoplasm              |
| MTSS1      | Abgent       | AT2933a     | Mouse Monoclonal Antibody  | 1:1000                | cytoplasm and nucleus  |
| myosin-9   | Santa Cruz   | sc-98978    | Rabbit Polyclonal Antibody | 1:500                 | cytoplasm              |
| profilin-1 | Abcam        | ab124904    | Rabbit Monoclonal Antibody | 1:1000                | cytoplasm and nucleus  |
| Rac1       | Cytoskeleton | ARC03       | Mouse Monoclonal Antibody  | 1:20                  | cytoplasm and nucleus  |
| radixin    | Abcam        | Ab52495     | Rabbit Monoclonal Antibody | 1:200                 | cytoplasm              |
| ROCK2      | Santa Cruz   | sc -100425  | Mouse Monoclonal Antibody  | 1:500                 | cytoplasm              |
| talin      | Santa Cruz   | sc-28542    | Mouse Monoclonal Antibody  | 1:50                  | cytoplasm              |
| tensin     | Santa Cruz   | sc-28542    | Rabbit Polyclonal Antibody | 1:50                  | cytoplasm              |
| villin 1   | Proteintech  | 66096-1-Ig  | Mouse Monoclonal Antibody  | 1:200                 | cytoplasm              |

sets of genes of prognostic importance in various types of cancer [3-6]. Nevertheless, the use of microarrays in clinical practice is limited by the overwhelming number of genes identified by gene profiling, lack of both reproducibility and independent validation, and need for complicated statistical analyses [7]. Different prognostic gene sets are identified when the microarray platform and the analytic strategy vary [8]. Moreover, suitable specimens from patients are still a technical challenge for gene-expression profiling, which requires frozen tissue for analysis [9]. To put these expression profiles into clinical practice, it is essential to identify the appropriate number of genes and develop a profile that can be operated by conventional assay. The aim of this study was to evaluate the expression of 15 cytoskeleton proteins and their correlation with the clinical outcome of ESCC patients. We also develop a technically simple immunohistochemistry-based three-protein signature model for current clinical risk stratification approaches and test its performance using an independent validation dataset of ESCC tissue samples.

## RESULTS

### Immunohistochemical Characteristics of 15 Biomarkers

Initially, more than 15 biomarkers were examined by immunohistochemical staining. Some molecular hallmarks, however, were not optimized successfully or showed ambiguous or no immunostaining. All 15 biomarkers mainly stained the tumour cell cytoplasm and showed a variety of staining patterns of different staining intensity and positive cell percentage. Based on the staining intensity, all biomarkers displayed the four

immunostaining phenotypes: negative staining, weakly positive staining, moderate positive staining and strongly positive staining in ESCC. The staining patterns of the 15 biomarkers were focal, scattered and diffuse with different staining intensities. Cofilin 1, ezrin, fascin, moesin, myosin-9, radixin, ROCK2, talin, tensin and villin 1 were constitutively observed in the cytoplasm, and Annexin II was observed in the membrane and cytoplasm. Kindlin-2, MTSS1, profilin-1 and Rac1 not only showed positive cytoplasmic immunostaining, but also strong nuclear immunostaining. The staining pattern of the 15 biomarkers is summarized in Table 1. Representative pictures of the 15 biomarkers with low- and high-expression are shown in Figure 1.

### Prognostic Significance of 15 Biomarkers and Clinicopathological Characteristics

The 1-, 3-, and 5-year OS and DFS percentages, for the generation dataset, were 87.3% and 88.0%, 59.3% and 57.9%, and 44.4% and 45.0%, respectively. According to the Kaplan-Meier analysis, Annexin II and myosin-9 were closely associated with OS among patients with ESCC, and kindlin-2 was of only borderline significance in the relatively small generation cohort. However, the remaining 12 biomarkers had no statistical significance between protein expression and clinical outcome of ESCC (Figure 2). Kaplan-Meier analysis for DFS showed that three biomarkers (Annexin II, kindlin-2 and myosin-9) correlated with recurrence (Figure 3A-3C). On univariate analyses, the three biomarkers and two clinicopathological factors (regional lymph nodes and TNM classification) were all confirmed as prognostic factors for OS and DFS, while other clinicopathological indexes (age, gender, tumor location, tumor size, primary tumor, histologic grade and therapy) had no prognostic significance for OS

and DFS (Table 2).

### The Predictive Model Based on the Three Biomarkers

A three-protein signature model, involving Annexin II, kindlin-2, and myosin-9, resulted from our analysis. The risk score of 3-protein signature predictive model was calculated as described in the equation:

$$Y = (\beta_1) \times (\text{Annexin II}) + (\beta_2) \times (\text{Kindlin-2}) + (\beta_3) \times (\text{Myosin-9})$$

Here, Y is the outcome final predictive risk score and  $\beta_n$  is its corresponding regression coefficient, using

univariate Cox proportional hazards regression analysis. The corresponding coefficients were as follows:  $\beta_1=0.808$ ,  $\beta_2=0.522$  and  $\beta_3=0.829$ . The 50th percentile (median) of the final risk scores was 0.808 (0 to 2.159). All patients were ranked and divided into high-risk (risk score  $>0.808$ ) and low-risk groups (risk score  $\leq 0.808$ ).

The 5-year OS and DFS rates in high-risk group were significantly lower than those in low-risk group (21.0% and 21.3% vs. 53.5% and 54.3%,  $P=0.000$  and  $P=0.000$ , Figure 4A, 4B). Using univariate analyses, we found a significant correlation between the three-protein signature and prognosis in all the cases ( $P=0.000$  for OS and DFS, Table 2). According to multivariable Cox proportional hazard regression analysis, both regional

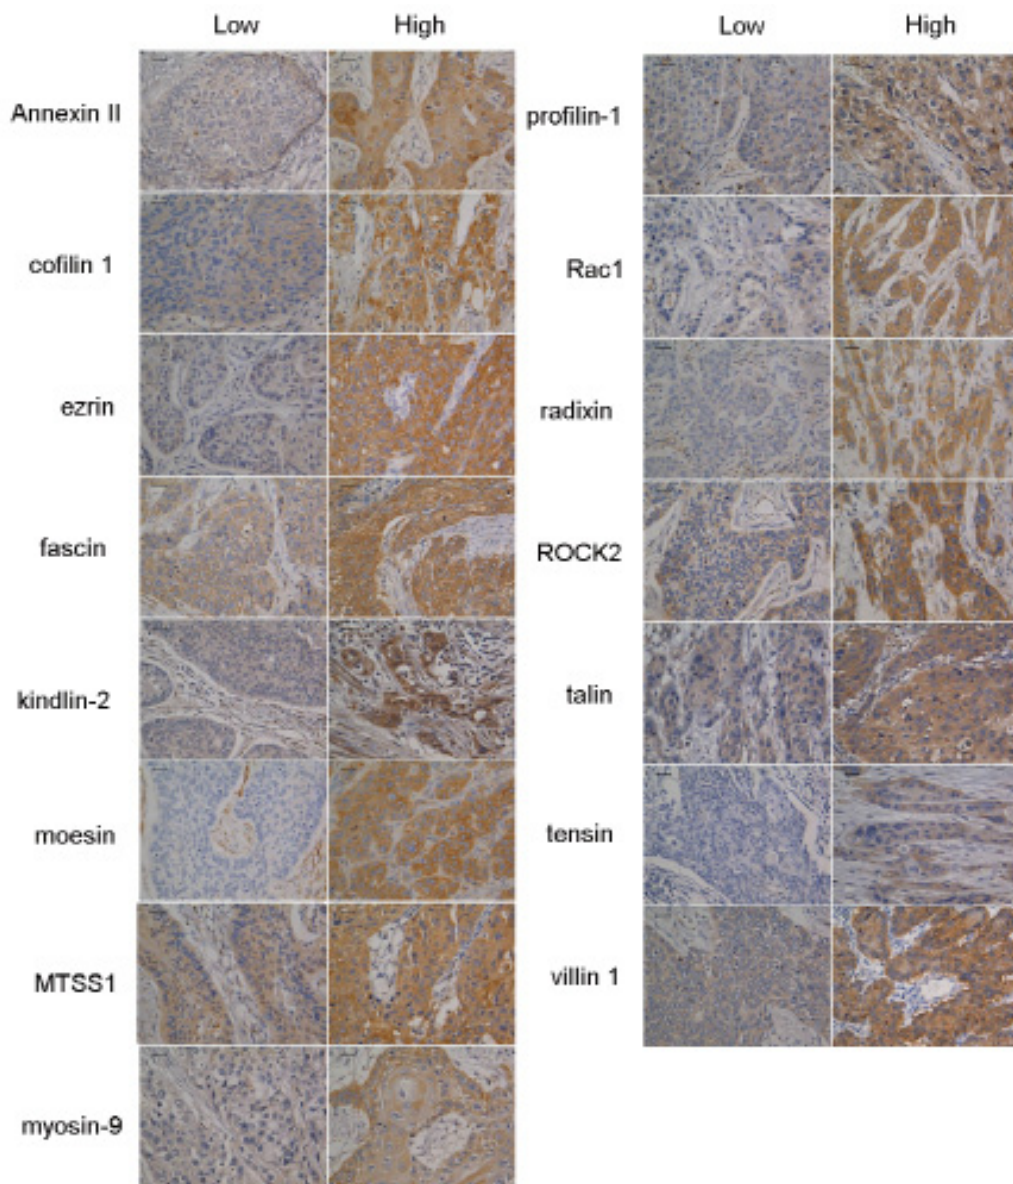

**Figure 1: Representative positive expressions of Annexin II, cofilin 1, ezrin, fascin, kindlin-2, moesin, Metastasis suppressor 1 (MTSS1), myosin-9, profilin-1, Ras-related C3 botulinum toxin substrate 1 (Rac1), radixin, Rho-associated coiled-coil containing protein kinase 2 (ROCK2), talin, tensin and villin 1 by immunohistochemistry in tissue microarrays. Scale bars = 50  $\mu\text{m}$ .**



**Table 2: Univariate and multivariate analyses of factors associated with overall survival (OS) and disease-free survival (DFS) in the generation and validation datasets**

| Variables                                        | Generation dataset |       |                    |       | Validation dataset |       |                    |       |
|--------------------------------------------------|--------------------|-------|--------------------|-------|--------------------|-------|--------------------|-------|
|                                                  | OS                 |       | DFS                |       | OS                 |       | DFS                |       |
|                                                  | HR (95%CI)         | P     |
| Univariate analyses                              |                    |       |                    |       |                    |       |                    |       |
| Age (>58 vs. ≤58)                                | 1.22(0.72 to 2.05) | 0.454 | 1.32(0.80 to 2.21) | 0.280 | 1.09(0.71 to 1.68) | 0.699 | 0.98(0.65 to 1.48) | 0.917 |
| Gender (Female vs. Male)                         | 0.83(0.46 to 1.50) | 0.543 | 0.77(0.43 to 1.38) | 0.382 | 0.91(0.55 to 1.52) | 0.723 | 0.95(0.59 to 1.53) | 0.827 |
| Tumor Location                                   |                    | 0.806 |                    | 0.702 |                    | 0.593 |                    | 0.851 |
| Upper vs. Middle                                 | 0.98(0.35 to 2.73) | 0.967 | 0.71(0.22 to 2.29) | 0.569 | 0.58(0.21 to 1.64) | 0.308 | 1.07(0.48 to 2.40) | 0.873 |
| Lower vs. Middle                                 | 0.79(0.38 to 1.61) | 0.512 | 0.78(0.38 to 1.60) | 0.499 | 0.93(0.59 to 1.45) | 0.743 | 0.90(0.58 to 1.39) | 0.636 |
| Tumor Size                                       |                    | 0.541 |                    | 0.354 |                    | 0.416 |                    | 0.481 |
| 3-5cm vs. ≤3cm                                   | 1.37(0.73 to 2.59) | 0.329 | 1.35(0.73 to 2.51) | 0.341 | 1.34(0.77 to 2.33) | 0.304 | 1.26(0.75 to 2.13) | 0.378 |
| >5cm vs. ≤3cm                                    | 1.54(0.60 to 3.98) | 0.373 | 1.89(0.77 to 4.63) | 0.164 | 1.51(0.81 to 2.81) | 0.197 | 1.43(0.79 to 2.57) | 0.233 |
| Primary Tumor (T3+T4 vs. T1+T2)                  | 2.09(0.51 to 8.58) | 0.305 | 1.38(0.43 to 4.43) | 0.585 | 1.07(0.57 to 2.02) | 0.835 | 1.19(0.63 to 2.24) | 0.583 |
| Histologic Grade                                 |                    | 0.758 |                    | 0.416 |                    | 0.033 |                    | 0.012 |
| G2 vs. G1                                        | 0.84(0.47 to 1.48) | 0.540 | 0.77(0.45 to 1.33) | 0.346 | 1.96(0.94 to 4.09) | 0.073 | 2.30(1.11 to 4.79) | 0.026 |
| G3 vs. G1                                        | 0.71(0.24 to 2.11) | 0.542 | 0.49(0.14 to 1.64) | 0.245 | 3.38(1.36 to 8.41) | 0.009 | 3.91(1.59 to 9.60) | 0.003 |
| Regional Lymph Nodes (N1+N2+N3 vs. N0)           | 2.69(1.56 to 4.63) | 0.000 | 2.52(1.49 to 4.26) | 0.001 | 2.45(1.52 to 3.95) | 0.000 | 2.62(1.66 to 4.14) | 0.000 |
| TNM classification (III+IV vs. I+II)             | 2.79(1.62 to 4.78) | 0.000 | 2.43(1.45 to 4.09) | 0.001 | 2.34(1.48 to 3.70) | 0.000 | 2.54(1.63 to 3.94) | 0.000 |
| Therapy (Comprehensive Therapy vs. Only Surgery) | 1.28(0.57 to 2.86) | 0.549 | 0.86(0.36 to 2.06) | 0.733 | 0.60(0.36 to 1.01) | 0.055 | 0.80(0.50 to 1.28) | 0.350 |
| Annexin II (high vs. low)                        | 2.24(1.16 to 4.35) | 0.017 | 2.62(1.35 to 5.08) | 0.005 | 1.52(0.98 to 2.35) | 0.062 | 1.36(0.89 to 2.05) | 0.151 |
| kindlin-2 (high vs. low)                         | 1.69(0.99 to 2.88) | 0.056 | 1.68(0.98 to 2.85) | 0.058 | 1.73(1.04 to 2.86) | 0.034 | 1.51(0.92 to 2.49) | 0.103 |
| myosin-9 (high vs. low)                          | 2.29(1.15 to 4.56) | 0.018 | 2.31(1.16 to 4.60) | 0.017 | 1.69(1.08 to 2.65) | 0.022 | 1.59(1.03 to 2.46) | 0.036 |
| 3-protein signature (high vs. low)               | 2.74(1.60 to 4.70) | 0.000 | 2.78(1.62 to 4.77) | 0.000 | 1.85(1.20 to 2.86) | 0.005 | 1.65(1.09 to 2.51) | 0.018 |
| Multivariate analysis                            |                    |       |                    |       |                    |       |                    |       |
| Histologic Grade                                 |                    |       |                    |       |                    | 0.035 |                    | 0.009 |
| G2 vs. G1                                        |                    |       |                    |       | 1.74(0.83 to 3.63) | 0.142 | 2.12(1.02 to 4.41) | 0.045 |
| G3 vs. G1                                        |                    |       |                    |       | 3.27(1.31 to 8.15) | 0.011 | 4.08(1.65 to 10.1) | 0.002 |
| Regional Lymph Nodes (N1+N2+N3 vs. N0)           | 2.36(1.36 to 4.11) | 0.002 | 2.22(1.30 to 3.80) | 0.003 | 2.29(1.42 to 3.70) | 0.001 | 2.50(1.58 to 3.96) | 0.000 |
| 3-protein signature (high vs. low)               | 2.34(1.35 to 4.05) | 0.002 | 2.41(1.40 to 4.17) | 0.002 | 1.70(1.10 to 2.64) | 0.017 | 1.51(0.99 to 2.29) | 0.055 |

NOTE. Multivariate analysis, Cox proportional hazards regression model. Variables were adopted for their prognostic significance by univariate analysis.

lymph nodes and the 3-protein signature were strong and independent prognostic factors for both OS and DFS (for regional lymph nodes, hazard ratio=2.36 [95% CI, 1.36-4.11],  $P=0.002$  and hazard ratio=2.22 [95% CI, 1.30-3.80],  $P=0.003$ ; for the 3-protein signature, hazard ratio=2.34 [95% CI, 1.35-4.05],  $P=0.002$  and hazard ratio=2.41 [95% CI, 1.40-4.17],  $P=0.002$ , Table 2).

### Predictive Power of the Predictive Model

In comparison with a single biomarker, the predictive power of the 3-protein signature was more robust than that of Annexin II, kindlin-2, or myosin-9 alone, as revealed by ROC curve analysis (Figure 5A, 5C). The specificity and sensitivity were 83% and 40.4%, respectively, and the area under the curve (AUC) with 95% CI for OS was 0.617. Moreover, the predictive power of the 3-protein signature, which almost same as that of regional lymph nodes and TNM classification, was higher than other clinicopathological indices (age, gender, tumor location, tumor size, primary tumor, histologic grade and therapy) (Figure 5B, 5D).

### Validation of the Predictive Model

We validated the 3-protein signature predictive model by TMAs on another independent cohort of 147 specimens with ESCC. The results were similar to those in the generation dataset. Annexin II, kindlin-2, and myosin-9 were optimized successfully to stain tissue and were prognostic in the validation dataset, but borderline significant for Annexin II (Figure 3D-3F). Only kindlin-2 and myosin-9 were closely related to tumor recurrence (Figure 3G-3I). ESCC patients in the high-risk group had a shorter 5-year OS and DFS than those in low-risk group (33.7% and 32.2% vs. 50.8% and 47.7%,  $P=0.005$  and  $P=0.016$ , Figure 4C, 4D). On univariate analyses, the three biomarkers and four clinicopathological factors (histologic grade, regional lymph nodes, TNM classification and therapy) were all confirmed as prognostic factors for OS, while only myosin-9 and three clinicopathological factors (histologic grade, regional lymph nodes and TNM classification) were risk factors for tumour recurrence of ESCC. And using univariate analyses, we also found a significant correlation between the three-protein signature and prognosis in all the cases ( $P=0.005$  for OS and  $P=0.018$  for DFS). In multivariate analysis, the 3-protein signature model was still a strong and independent

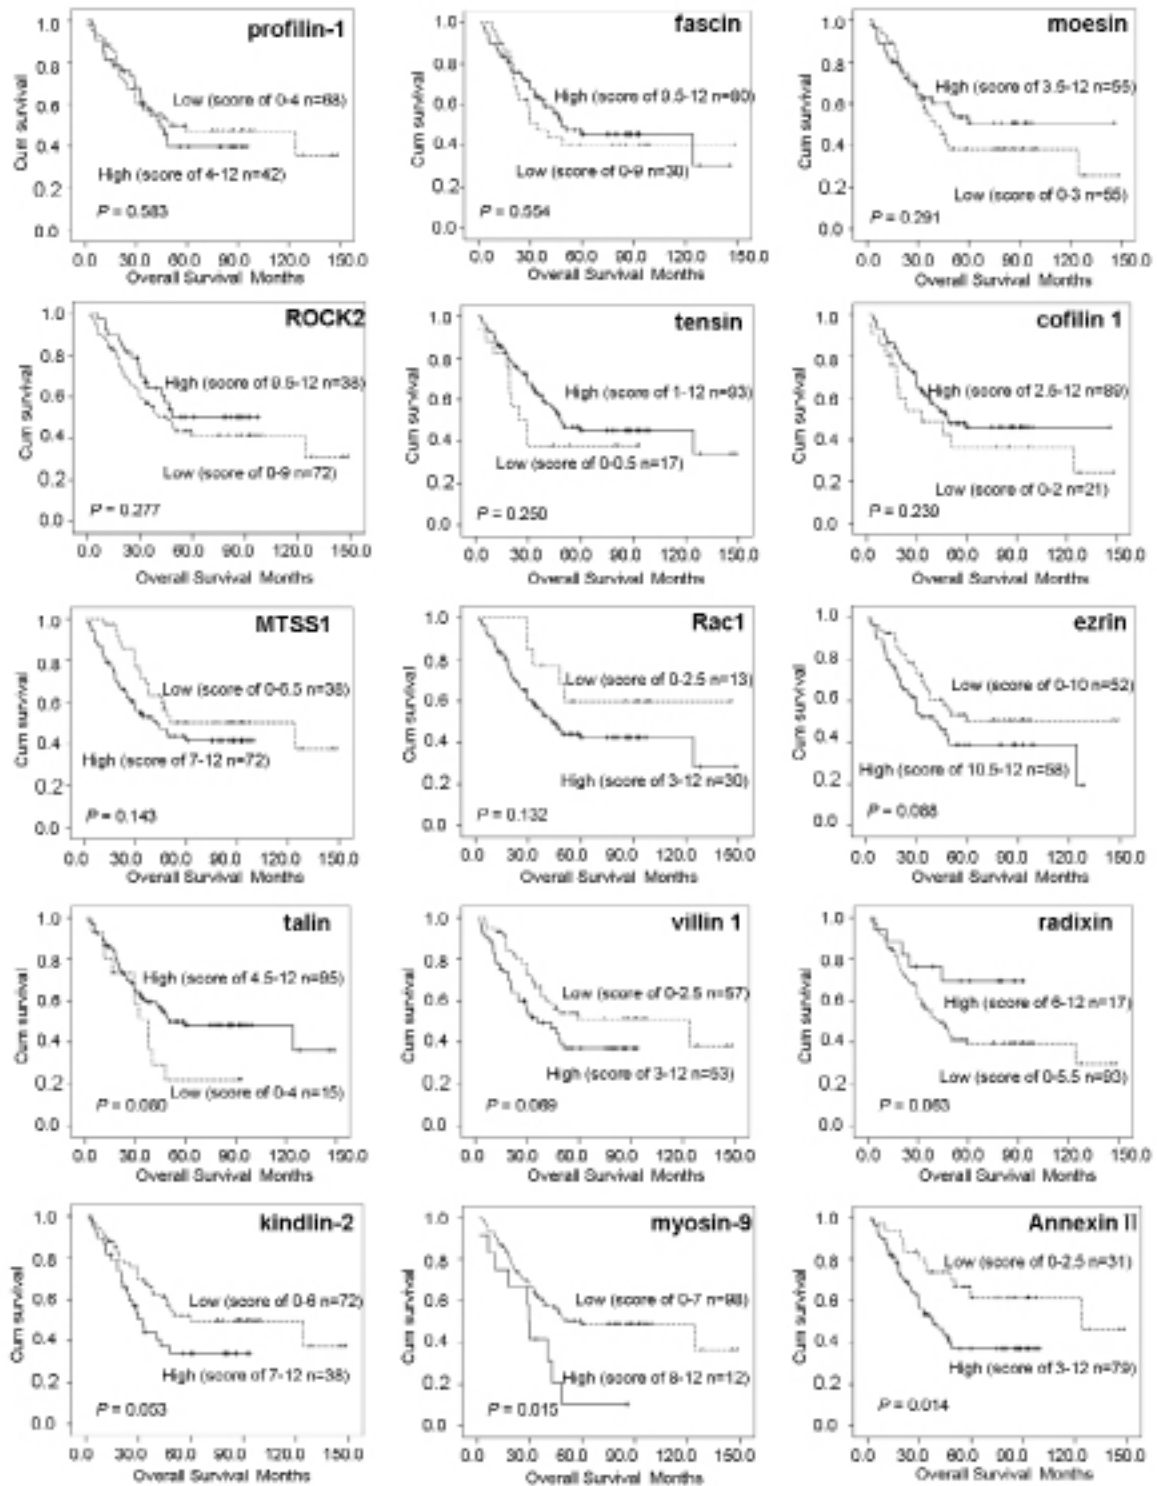

Figure 2: Kaplan-Meier analysis of overall survival for 15 kinds of cytoskeleton proteins in the generation dataset of 110 cases.

predictor of OS and DFS in validation dataset (hazard ratio= 1.70 [95% CI, 1.10-2.64],  $P=0.017$  and hazard ratio=1.51 [95% CI, 0.99-2.29],  $P=0.055$ ), together with histologic grade and regional lymph nodes (Table 2). The  $P$  values for Annexin II indicated some difference between generation dataset and validation dataset, which may be due mainly to the sample size and limited follow-up time. The ROC curve analysis revealed that the predictive ability of the 3-protein signature was higher than that of a single biomarker and other clinicopathological indices, and approximated regional lymph nodes and TNM classification (Figure 5E-5H).

### Combination of the three-protein signature and TNM classification

Our results indicated that there is a significant correlation between the three-protein signature and prognosis in all the cases. In current clinical practice, TNM classification is considered the optimal prognostic indicator. Therefore, we next considered these characteristics together. Patients were subdivided into three subgroups: low-risk + stage I+II, high-risk + stage III+IV, and other (low-risk + stage III+IV and high-risk + stage I+II). Those high-risk + stage III+IV patients had the poorest prognosis, while the low-risk + stage I+II subgroup had the best prognosis. Kaplan-Meier curves showed significant differences in OS among the three groups ( $P=0.000$  in generation dataset and validation

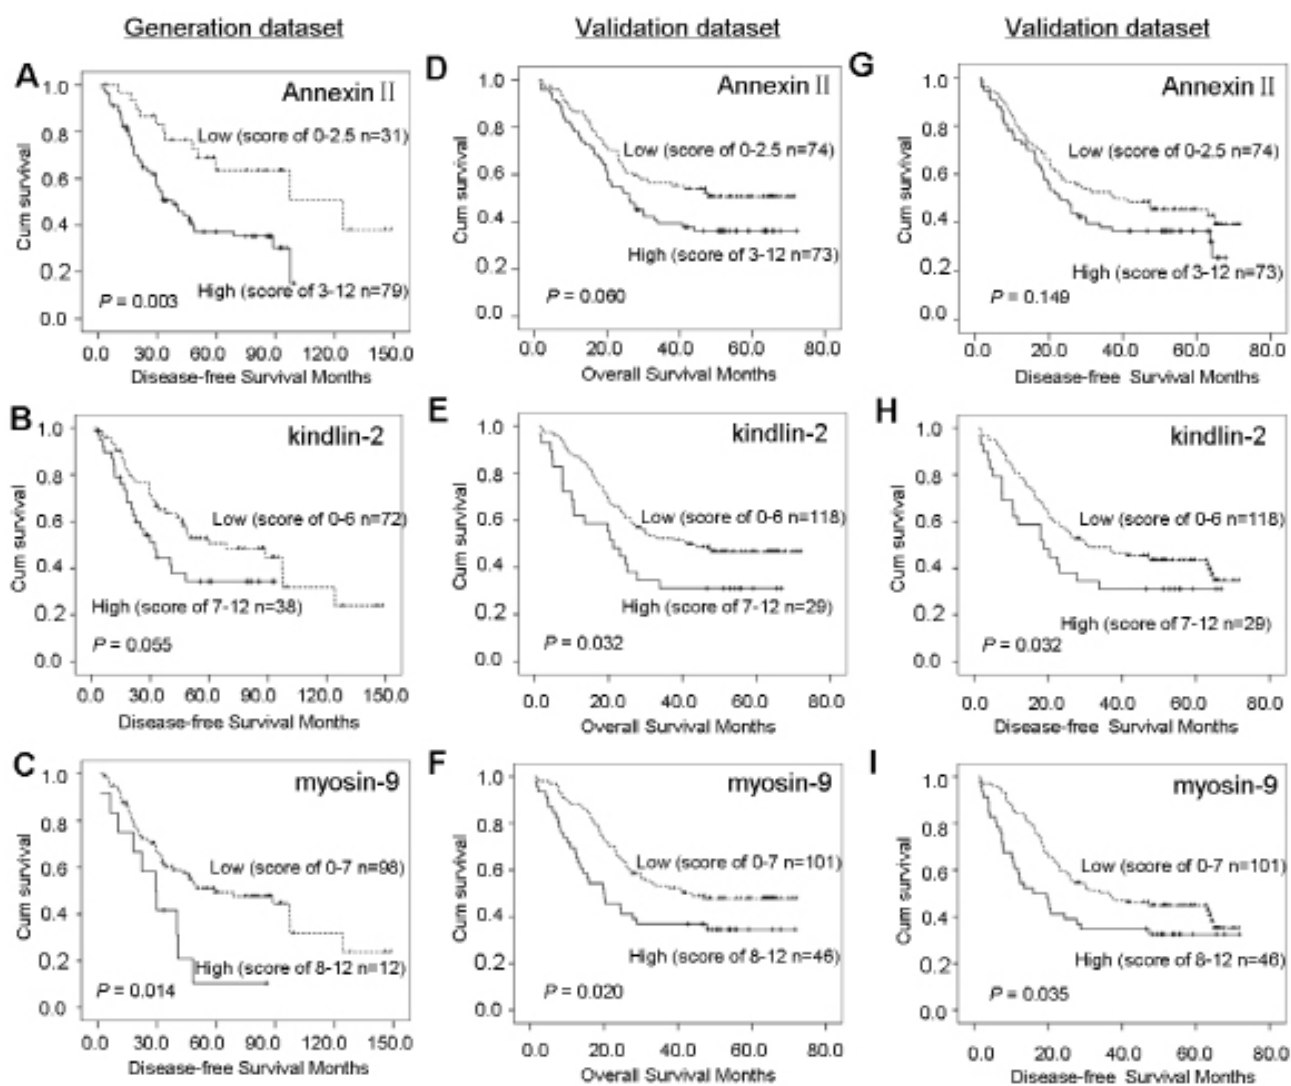

**Figure 3: Kaplan-Meier analysis of survival for Annexin II, kindlin-2 and myosin-9 in the two datasets.** In the generation dataset, disease-free survival is shown for the 110 patients with ESCC (A, B and C). In the validation dataset, overall survival and disease-free survival are shown for the 147 patients with ESCC (D, E, F and G, H, I).

dataset, Figure 6A, 6B). However, cumulative survival time was to be the same between the high-risk + stage III+IV subgroup and other subgroup at about 50 months in validation dataset. That the median follow-up time of validation dataset was 28.8 months might be the reason. The ROC curve analysis indicated that the combination was most robust among four indices (the combination of the three-protein signature and TNM classification, 3-protein signature, regional lymph nodes and TNM classification) (Figure 6C-6F).

## DISCUSSION

This study generates and internally validates a 3-protein signature predictive model that predicts prognosis and tumor recurrence in two entirely independent cohorts of ESCC patients. The methodology performed in our predictive model is a cross-validation approach based on immunohistochemistry and statistical analysis. The reason for adopting this methodology is

that formalin-fixed, paraffin-embedded tissue has far greater availability than other types of samples, such as fresh-frozen samples, and immunohistochemistry is rapid, convenient, robust, technically simple, easy to interpret, reproducible, and cost-effective for clinical practice, unlike gene expression at the mRNA level, for example.

Molecular signatures are reported frequently and have proven to be prognostic in various tumors. Molecular signatures, similar to ours, have been shown to predict survival and/or tumor recurrence in breast cancer [10, 11], lung cancer [12], colorectal cancer [13], hepatocellular carcinoma [14, 15], bladder cancer [16], classic Hodgkin's lymphoma [17], neuroblastoma [18] and even esophageal and gastroesophageal junctional adenocarcinoma [19]. In ESCC, however, the application of molecular signatures is less advanced. Therefore, this study provides a useful framework for future work on generating similar prognostic models.

The biomarkers involved in this study were carefully selected according to our previous studies and

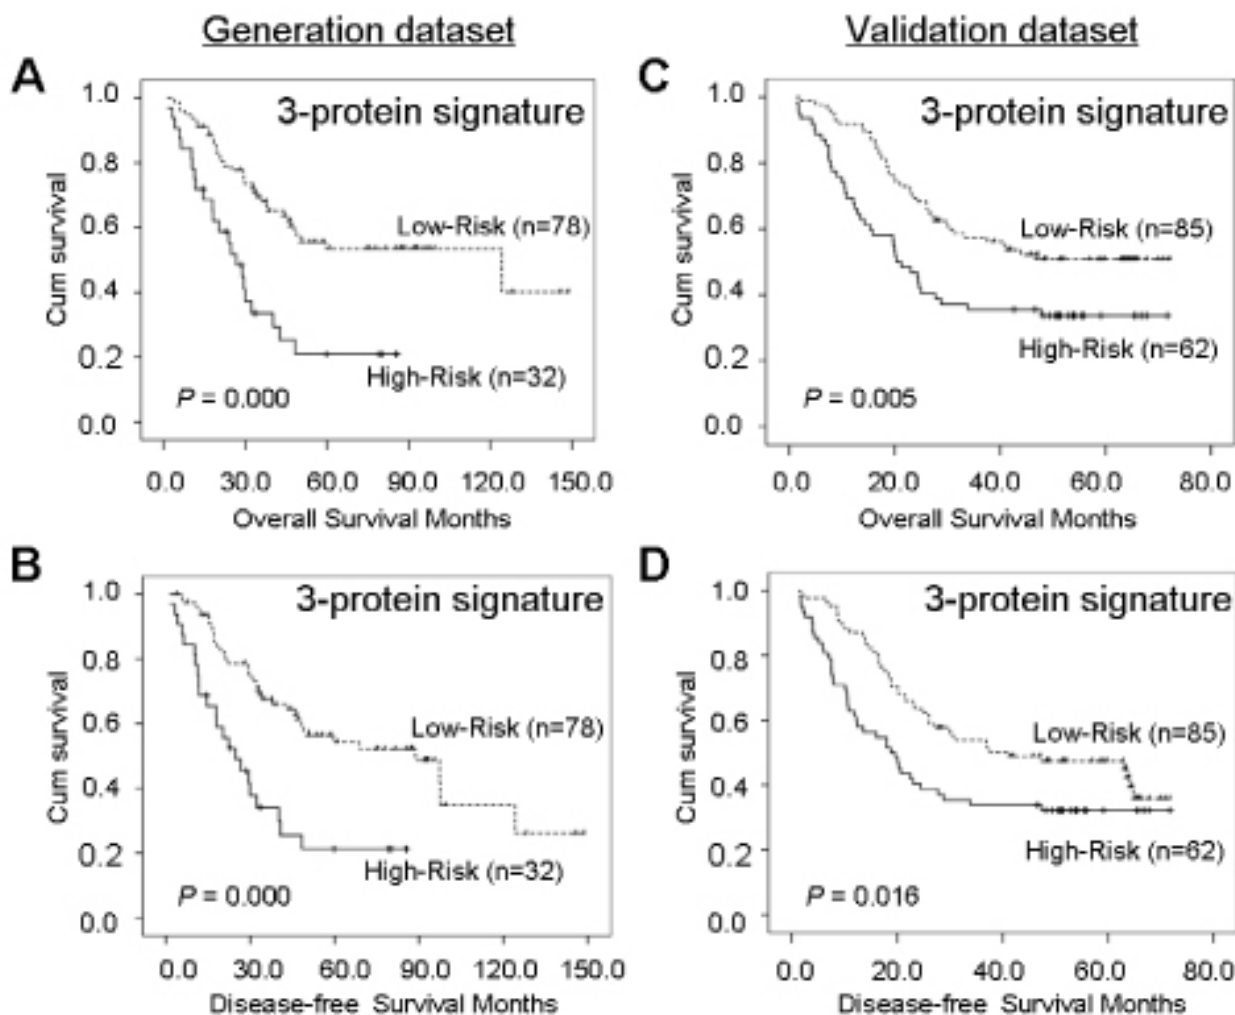

**Figure 4: Kaplan-Meier analyses of overall survival and disease-free survival for the three-protein signature model in the generation dataset of 110 cases (A and B) and in the validation dataset of 147 cases (C and D).**

**Table 3: Clinicopathological characteristics of the generation and validation datasets of patients with ESCC**

| Clinical and pathological indices  | Generation dataset |      | Validation dataset |      | Test statistic | df | P                  |
|------------------------------------|--------------------|------|--------------------|------|----------------|----|--------------------|
|                                    | No.                | %    | No.                | %    |                |    |                    |
| Specimens                          | 110                |      | 147                |      |                |    |                    |
| Median follow-up (Months)          | 36.5               |      | 28.8               |      | T=22.77        |    | 0.000 <sup>a</sup> |
| Age (year)                         |                    |      |                    |      |                |    |                    |
| ≤58                                | 55                 | 50   | 79                 | 53.7 | $\chi^2=0.353$ | 1  | 0.552              |
| >58                                | 55                 | 50   | 68                 | 46.3 |                |    |                    |
| Gender                             |                    |      |                    |      |                |    |                    |
| Male                               | 80                 | 72.7 | 113                | 76.9 | $\chi^2=0.578$ | 1  | 0.447              |
| Female                             | 30                 | 27.3 | 34                 | 23.1 |                |    |                    |
| Tumor Location                     |                    |      |                    |      |                |    |                    |
| Upper                              | 8                  | 7.3  | 10                 | 6.8  | $\chi^2=31.83$ | 2  | 0.000              |
| Middle                             | 81                 | 73.6 | 59                 | 40.1 |                |    |                    |
| Lower                              | 21                 | 19.1 | 78                 | 53.1 |                |    |                    |
| Tumor Size                         |                    |      |                    |      |                |    |                    |
| ≤3cm                               | 32                 | 29.1 | 38                 | 25.8 | $\chi^2=31.64$ | 3  | 0.000              |
| 3-5cm                              | 45                 | 40.9 | 71                 | 48.3 |                |    |                    |
| >5cm                               | 11                 | 10   | 36                 | 24.5 |                |    |                    |
| unknown                            | 22                 | 20   | 2                  | 1.4  |                |    |                    |
| Primary Tumor (T)                  |                    |      |                    |      |                |    |                    |
| T1+T2                              | 7                  | 6.4  | 20                 | 13.6 | $\chi^2=3.510$ | 1  | 0.061              |
| T3+T4                              | 103                | 93.6 | 127                | 86.4 |                |    |                    |
| Histologic Grade (G)               |                    |      |                    |      |                |    |                    |
| G1                                 | 33                 | 30   | 23                 | 15.6 | $\chi^2=7.640$ | 2  | 0.022              |
| G2                                 | 67                 | 60.9 | 109                | 74.2 |                |    |                    |
| G3                                 | 10                 | 9.1  | 15                 | 10.2 |                |    |                    |
| Regional Lymph Nodes (N)           |                    |      |                    |      |                |    |                    |
| N0                                 | 57                 | 51.8 | 64                 | 43.5 | $\chi^2=1.732$ | 1  | 0.188              |
| N1+N2+N3                           | 53                 | 48.2 | 83                 | 56.5 |                |    |                    |
| TNM classification                 |                    |      |                    |      |                |    |                    |
| IA+IB+IIA+IIB                      | 59                 | 53.6 | 70                 | 47.6 | $\chi^2=0.911$ | 1  | 0.340              |
| IIIA+IIIB+IIIC+IV                  | 51                 | 46.4 | 77                 | 52.4 |                |    |                    |
| Therapy                            |                    |      |                    |      |                |    |                    |
| Only Surgery                       | 99                 | 90   | 104                | 70.7 | $\chi^2=14.05$ | 1  | 0.000              |
| Comprehensive Therapy <sup>b</sup> | 11                 | 10   | 43                 | 29.3 |                |    |                    |

NOTE. Comparisons between groups were performed using the chi-squared test unless otherwise indicated.

<sup>a</sup>One-Sample T Test.

<sup>b</sup>Comprehensive therapy including surgery + chemotherapy, surgery + radiotherapy and surgery + chemotherapy + radiotherapy.



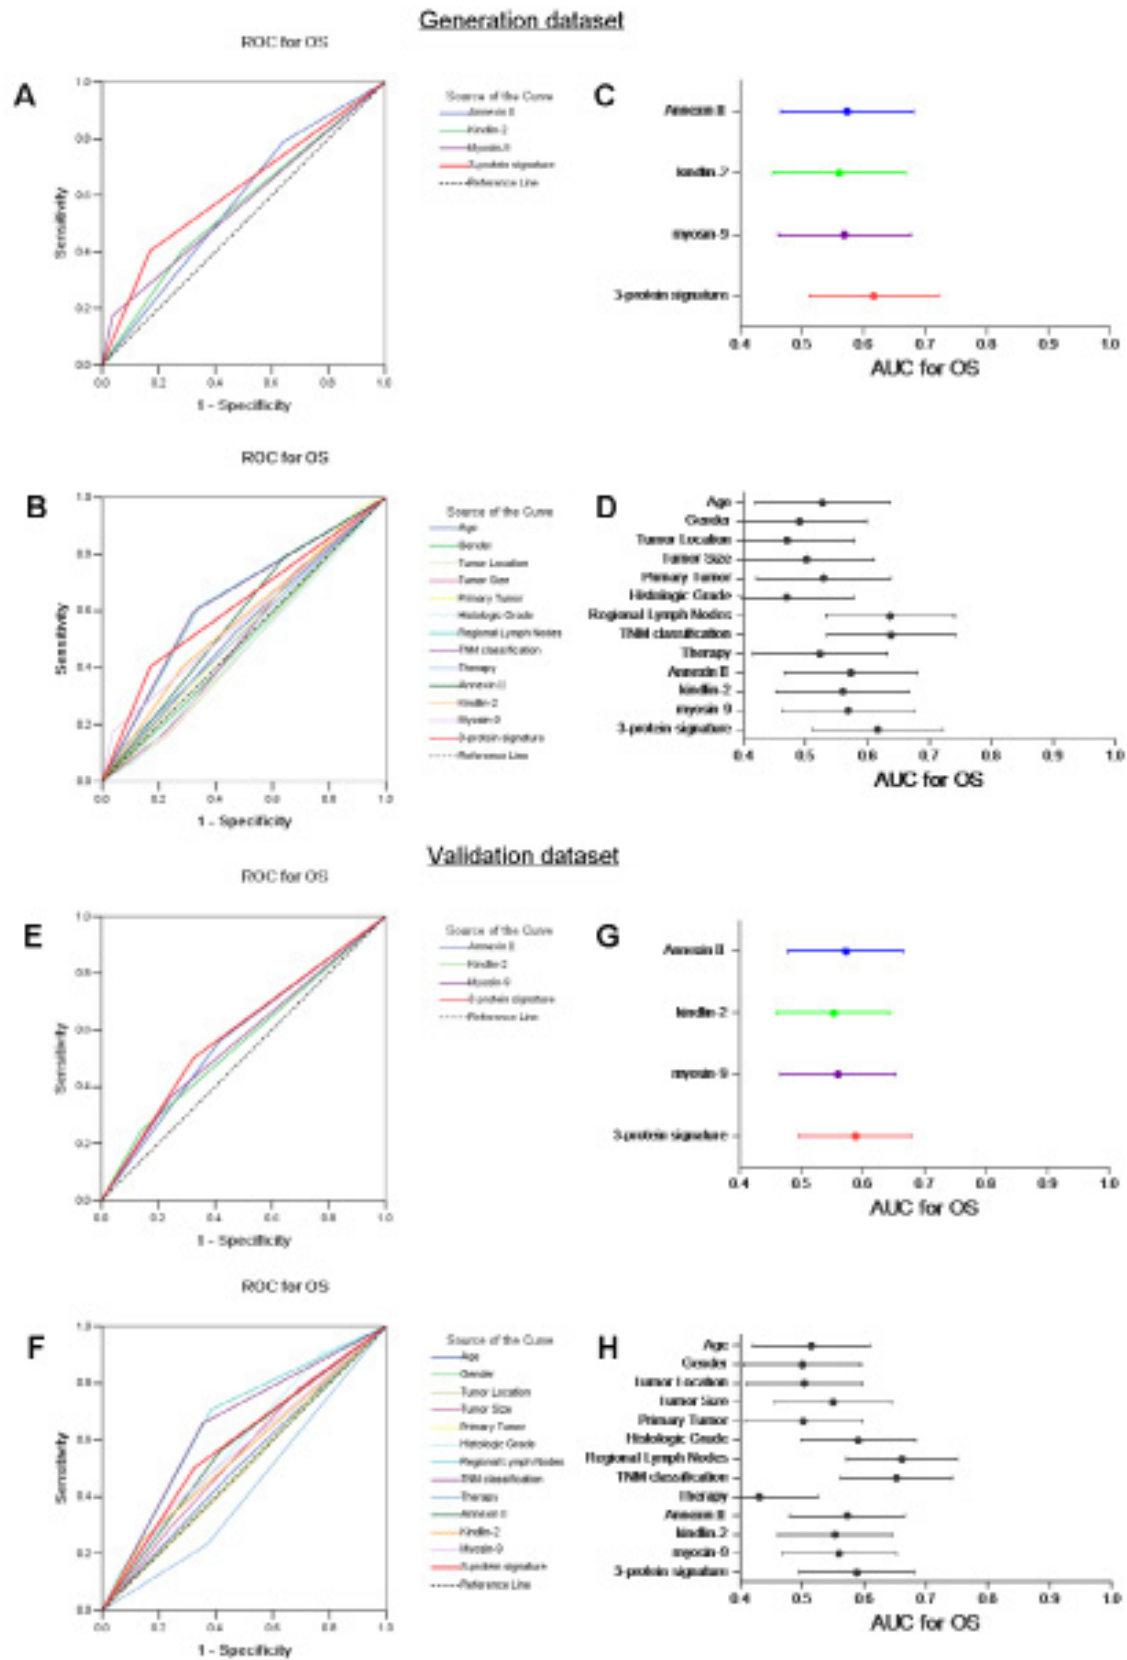

Figure 5: Predictive ability of the 3-protein signature model compared with single biomarkers and other clinical prognostic indices according to receiver operating characteristic (ROC) curves and areas under the curve (AUCs) with 95% CI in the generation dataset (A, B and C, D) and the validation dataset (E, F and G, H).

other reports. The cytoskeleton, which plays a prominent role in the cell cycle, morphogenesis and migration, is closely associated with human tumors [20]. Recent studies from our laboratory and others have identified more than 200 different cytoskeleton constituents or binding proteins. However, only about 45 kinds have been reported in ESCC [21]. Hence, the 15 biomarkers used here include biomarkers that are reported for the first time. In addition, our 15 biomarkers all belong to actin-binding proteins [22]. Annexin II is a member of the calcium-dependent phospholipid-binding protein family, plays a role in the regulation of cellular growth and in

signal transduction pathways, and is overexpressed in hepatocellular carcinoma [23], colorectal cancer [23, 24], breast cancer [23, 25] and ESCC [23, 26], and has also been identified as a potential target for therapy [27, 28]. Our result showed the same as Zhang X and Feng JG [23, 26]. Kindlin-2 is a member of the kindlin family of focal adhesion proteins, and is involved in integrin signaling and linkage of the actin cytoskeleton to the extracellular matrix. Although few studies report on kindlin-2, it has been found to be up-regulated in breast and gastric cancer cell lines [29, 30], but down-regulated in leiomyosarcomas [31] and mesenchymal cancer cells [32]. Targeting

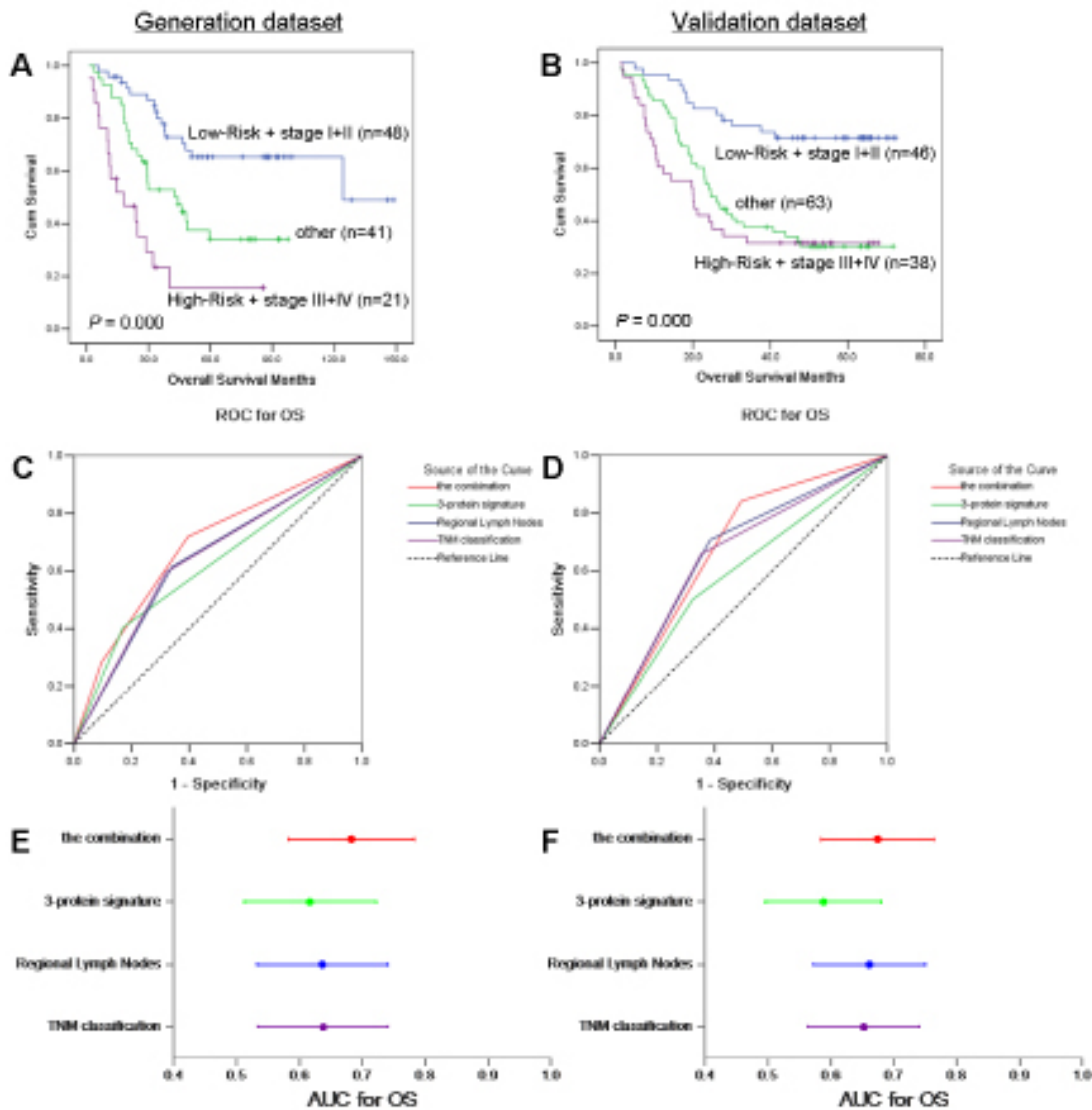

**Figure 6: Kaplan-Meier analysis and predictive ability of the combination of the 3-protein signature and TNM classification in the generation and validation datasets.** Kaplan-Meier analyses of overall survival for the combination of the 3-protein signature and TNM classification in two datasets (A and B). Predictive ability of the combination compared with 3-protein signature, regional lymph nodes and TNM classification by receiver operating characteristic (ROC) curves (C and D) and areas under the curve (AUCs) with 95% CI are shown in E and F.

kindlin-2 may improve drug efficacy and reduce the dose of drug required to treat prostate cancer [33]. Our results reveal that over-expression of kindlin-2 is associated with poor prognosis of ESCC. Myosin-9 is a myosin IIA heavy chain, and is involved in several important functions, including cytokinesis, cell motility and maintenance of cell shape. Myosin-9 has been reported to be a target for anti-invasive treatment in human MCF-7 breast cancer cells [34] and gastric cancer [35]. High expression of myosin-9 is correlated with short survival in lung adenocarcinoma and ESCC [36], similar to our results.

The 3 biomarkers are heterogeneously expressed in clinical samples, and the positive frequency of a single biomarker is commonly <10%. No patient expressed all the 15 biomarkers and only 7.0% (18/257) patients expressed the three biomarkers simultaneously. Therefore, it is reasonable to combine multiple biomarkers instead of an individual marker, which will significantly increase both the predictive range and power of the predictive model.

In this study, the three markers (Annexin II, kindlin-2 and myosin-9) combined prove to be significant predictors of OS and DFS. ESCC patients predicted to be high-risk had a very poor prognosis and were more prone to experience tumour recurrence. The predictive power of the 3-protein signature closely approached the predictive power of clinical staging, and that of the combination of the 3-protein signature and TNM classification was stronger than clinical staging. The 3 biomarkers employed in our predictive model may provide a novel therapeutic candidate for ESCC. Certainly, this study is a retrospective study that is limited to patients with ESCC undergoing curative resection. Prospective studies involving larger populations will be required to further validate the usefulness of this system. In conclusion, we demonstrate a clinically applicable prognostic model that accurately predicts ESCC patient survival and/or tumor recurrence, and thus can serve as a complement to current clinical risk stratification approaches.

## **MATERIALS AND METHODS**

### **Patients and Tissue Specimens**

Two independent datasets (ESCC tissues) were randomly collected from patients with ESCC undergoing curative resection at Shantou Central Hospital from 2000 to 2006 (generation dataset, n=110) and from 2007 to 2009 (validation dataset, n=147), and embedded in paraffin. Patients in the generation dataset were followed up for a maximum period of 148.7 months and a median of 36.5 months, while follow-up of patients in the validation dataset was terminated on 20 November 2013 at a median of 28.8 months. Overall survival (OS) was

defined as the interval between surgery and death or the last observation taken. Disease-free survival (DFS) was defined as the interval between the date of surgery and the date of diagnosis of any type of relapse or death. All the tumors were confirmed as ESCC by the pathologists in the Clinical Pathology Department of the Hospital, and the cases were classified according to the seventh edition of the tumor-node-metastasis (TNM) classification of the International Union against Cancer. Evaluation of tumor differentiation was based on histological criteria of the guidelines of the WHO Pathological Classification of Tumors. Information on age, gender, stage of disease, therapy and histopathological factors (such as tumor location, tumor size, primary tumor, histologic grade, regional lymph nodes) was obtained from the medical records. Patient data is summarized in Table 3, and there is no statistical difference between the two datasets using the chi-squared test. The study was approved by the ethical committee of the Central Hospital of Shantou City and the ethical committee of the Medical College of Shantou University, and written informed consent was obtained from all surgical patients to use resected samples for research.

### **Tissue Microarrays (TMAs) and Immunohistochemistry**

Markers that were used included Annexin II, cofilin 1, ezrin, fascin, kindlin-2, moesin, Metastasis suppressor 1 (MTSS1), myosin-9, profilin-1, Ras-related C3 botulinum toxin substrate 1 (Rac1), radixin, Rho-associated coiled-coil containing protein kinase 2 (ROCK2), talin, tensin and villin 1. These markers were analyzed in a test cohort of 110 formalin-fixed, paraffin-embedded esophageal curative resection specimens (generation dataset) using tissue microarrays (TMAs), and then, Annexin II, kindlin-2 and myosin-9, which were significantly related to clinical outcome in TMA analysis of the generation dataset, were further validated by the validation dataset TMAs.

TMA construction has been described in our previous studies [37-40]. Two tissue cores of 1.8 mm in diameter were taken from the donor blocks and transferred to the recipient paraffin block at defined array positions. These microarrays were serially sectioned (4  $\mu$ m) and stained with hematoxylin and eosin to ensure tissue sampling and completeness. The unstained sections were baked overnight at 56°C in preparation for immunohistochemistry staining.

Primary antibodies used in this study are shown in Table 1. Immunohistochemistry was carried out by a two-step protocol (PV-9000 Polymer Detection System, ZSGB-BIO, Beijing, China) as previously described [40].

## Evaluation of Immunohistochemical Variables

Tissue sections were independently and blindly assessed by three independent histopathologists (Cao HH, Wang SH, and Shen JH). Discrepancies were resolved by consensus. Positive reactions were defined as those showing brown signals in the cell cytoplasm. Each separate tissue core was scored on the basis of the intensity and area of positive staining. The intensity of positive staining was scored as follows: 0, negative; 1, weak staining; 2, moderate staining; 3, strong staining. The rate of positive cells was scored on a 0–4 scale as follows: 0, 0–5%; 1, 6–25%; 2, 26–50%; 3, 51–75%; 4, >75%. If the positive staining was homogeneous, a final score was achieved by multiplication of the two scores, producing a total range of 0–12. When the staining was heterogeneous, we scored it as follows: each component was scored independently and summed for the results. For example, a specimen containing 25% tumor cells with moderate intensity ( $1 \times 2 = 2$ ), 25% tumor cells with weak intensity ( $1 \times 1 = 1$ ), and 50% tumor cells without immunoreactivity ( $2 \times 0 = 0$ ), received a final score of  $2 + 1 + 0 = 3$ . The mean value of the two scores was considered representative of one tumour. For statistical analysis, we had each kind of protein expression score grouped into two subgroups, high-expression and low-expression, according to X-tile [41].

## Construction of a Weighted OS Predictive Score Algorithm

We had used a univariate Cox proportional hazards regression analysis to evaluate the association between clinical outcome and the expression of each biomarker. Subsequently, we developed a model for estimation of prognosis risk similar to what was described as follows. A patient's poor prognosis risk score was then derived by the summation of each biomarker's expression level (high-expression=1, low-expression=0) multiplied by its corresponding regression coefficient [42–44]. All patients were then dichotomized into high-risk and low-risk groups using the 50th percentile (median) cut-off of the final risk score as the threshold value.

## Statistical Analysis

Statistical analyses were performed using SPSS 13.0 for Windows. Comparisons between groups were performed using the chi-squared test and one-sample t test. Cumulative survival time was calculated by the Kaplan-Meier method and analyzed by the log-rank test. Univariate and multivariate analyses were based on the Cox proportional hazards regression model. Receiver operating characteristic (ROC) curve analysis was used

to determine the predictive value of the parameters, and the differences in the area under the curve (AUC) were detected by using GraphPad Prism 5. The Kendall tau-b rank correlation analysis was used to evaluate the association between our 3-gene signature expression and clinicopathological factors. A *P* value of less than 0.05 was considered statistically significant.

## ACKNOWLEDGEMENTS

We thank Dr. Stanley Li Lin, Department of Pathophysiology, The Key Immunopathology Laboratory of Guangdong Province, Shantou University Medical College, for the assistance in revising the manuscript. This work was supported by grants from the Natural Science Foundation of China (No.81172264 and No.81472613), the National High Technology Research and Development Program of China (No. 2012AA02A503 and No. 2012AA02A209), and the Natural Science Foundation of China-GuangDong Joint Fund (No. U0932001 and No. U1301227).

## REFERENCES

1. Siegel R, Naishadham D, Jemal A. Cancer statistics, 2013. *CA Cancer J Clin.* 2013; 12: 11–30.
2. Evans JA, Early DS, Chandraskhara V, Chandraskhara V, Chathadi KV, Fanelli RD, Fisher DA, Foley KQ, Hwang JH, Jue TL, Pasha SF, Sharaf R, Shergill AK, et al. The role of endoscopy in the assessment and treatment of esophageal cancer. *Gastrointest Endosc.* 2013; 77: 328–34.
3. Ramaswamy S, Ross KN, Lander ES, Golub TR. A molecular signature of metastasis in primary solid tumors. *Nat Genet.* 2003; 33: 49–54.
4. Ludwig JA, Weinstein JN. Biomarkers in cancer staging, prognosis and treatment selection. *Nat Rev Cancer.* 2005; 5: 845–56.
5. Tsao MS, Sakurada A, Cutz JC, Zhu CQ, Kamel-Reid S, Squire J, Lorimer I, Zhang T, Liu N, Daneshmand M, Marrano P, da Cunha Santos G, Lagarde A, et al. Erlotinib in lung cancer-molecular and clinical predictors of outcome. *N Engl J Med.* 2005; 353: 133–44.
6. De Preter K, Vermeulen J, Brors B, Delattre O, Eggert A, Fischer M, Janoueix-Lerosey I, Lavarino C, Maris JM, Mora J, Nakagawara A, Oberthuer A, Ohira M, et al. Accurate outcome prediction in neuroblastoma across independent data sets using a multigene signature. *Clin Cancer Res.* 2010; 16: 1532–41.
7. Chen HY, Yu SL, Chen CH, Chang GC, Chen CY, Yuan A, Cheng CL, Wang CH, Terng HJ, Kao SF, Chan WK, Li HN, Liu CC, et al. A Five-Gene Signature and Clinical Outcome in Non-Small-Cell Lung Cancer. *N Engl J Med.* 2007; 356: 11–20.
8. Lossos IS, Czerwinski DK, Alizadeh AA, Wechsler MA, Tibshirani R, Botstein D, Levy R. Prediction of survival in



- diffuse large-B-cell lymphoma based on the expression of six genes. *N Engl J Med.* 2004; 350: 1828-37.
9. Hoshida Y, Villanueva A, Kobayashi M, Peix J, Chiang DY, Camargo A, Gupta S, Moore J, Wrobel MJ, Lerner J, Reich M, Chan JA, Glickman JN, et al. Gene Expression in Fixed Tissues and Outcome in Hepatocellular Carcinoma. *N Engl J Med.* 2008; 359: 1995-04.
  10. Paik S, Shak S, Tang G, Domenech G, Cheung NK, Oberthuer A, Fischer M, Maris JM, Brodeur GM, Hero B, Rodriguez E, Suñol M, Galvan P, et al. A multigene assay to predict recurrence of tamoxifen-treated, node-negative breast cancer. *N Engl J Med.* 2004; 351: 2817-26.
  11. Prat A, Parker JS, Fan C, Cheang MC, Miller LD, Bergh J, Chia SK, Bernard PS, Nielsen TO, Ellis MJ, Carey LA, Perou CM. Concordance among Gene-Expression-Based Predictors for Breast Cancer. *Ann Oncol.* 2012; 23: 2866-73.
  12. Potti A, Mukherjee S, Petersen R et al. A Genomic Strategy to Refine Prognosis in Early-Stage Non-Small-Cell Lung Cancer. *N Engl J Med.* 2006; 355: 570-80.
  13. Sveen A, Ågesen TH, Nesbakken A, Dressman HK, Bild A, Koontz J, Kratzke R, Watson MA, Kelley M, Ginsburg GS, West M, Harpole DH Jr, Nevins JR. ColoGuidePro: A Prognostic 7-Gene Expression Signature for Stage III Colorectal Cancer Patients. *Clin Cancer Res.* 2012; 18: 6001-10.
  14. Hoshida Y, Villanueva A, Kobayashi M, Peix J, Chiang DY, Camargo A, Gupta S, Moore J, Wrobel MJ, Lerner J, Reich M, Chan JA, Glickman JN, et al. Gene Expression in Fixed Tissues and Outcome in Hepatocellular Carcinoma. *N Engl J Med.* 2008; 359: 1995-04.
  15. van Malenstein H, Gevaert O, Libbrecht L, Daemen A, Allemeersch J, Nevens F, Van Cutsem E, Cassiman D, De Moor B, Verslype C, van Pelt J. A Seven-Gene Set Associated with Chronic Hypoxia of Prognostic Importance in Hepatocellular Carcinoma. *Clin Cancer Res.* 2010; 16: 4278-88.
  16. Mitra AP, Cote RJ. Development and prospective evaluation of a 20-gene model for molecular nodal staging of bladder cancer. *Expert Rev Anticancer Ther.* 2011; 11: 849-52.
  17. Steidl C, Lee T, Shah SP, Farinha P, Han G, Nayar T, Delaney A, Jones SJ, Iqbal J, Weisenburger DD, Bast MA, Rosenwald A, Muller-Hermelink HK, et al. Tumor-Associated Macrophages and Survival in Classic Hodgkin's Lymphoma. *N Engl J Med.* 2010; 362: 875-85.
  18. Garcia I, Mayol G, Ríos J et al. A Three-Gene Expression Signature Model for Risk Stratification of Patients with Neuroblastoma. *Clin Cancer Res.* 2012; 18: 2012-23.
  19. Peters CJ, Rees JR, Hardwick RH, Domenech G, Cheung NK, Oberthuer A, Fischer M, Maris JM, Brodeur GM, Hero B, Rodriguez E, Suñol M, Galvan P, et al. A 4-Gene Signature Predicts Survival of Patients With Resected Adenocarcinoma of the Esophagus, Junction, and Gastric Cardia. *Gastroenterology.* 2010; 139: 1995-04.
  20. Alan Hall. The cytoskeleton and cancer. *Cancer Metastasis Rev.* 2009; 28: 5-14.
  21. Qi YJ, Chao WX, Chiu JF. An overview of esophageal squamous cell carcinoma proteomics. *J Proteomics.* 2012; 75: 3129-37.
  22. Winder SJ, Ayscough KR. Actin-binding proteins. *J Cell Sci.* 2005; 118: 651-54.
  23. Zhang X, Liu S, Guo C, Zong J, Sun MZ. The association of annexin A2 and cancers. *Clin Transl Oncol.* 2012; 14: 634-40.
  24. Duncan R, Carpenter B, Main LC, Telfer C, Murray GI. Characterisation and protein expression profiling of annexins in colorectal cancer. *Br J Cancer.* 2008; 98: 426-33.
  25. Sharma MR, Koltowski L, Ownbey RT, Tuszyński GP, Sharma MC. Angiogenesis-associated protein annexin II in breast cancer: selective expression in invasive breast cancer and contribution to tumor invasion and progression. *Exp Mol Pathol.* 2006; 81: 146-56.
  26. Feng JG, Liu Q, Qin X et al. Clinicopathological pattern and Annexin A2 and Cdc42 status in patients presenting with differentiation and lymphnode metastasis of esophageal squamous cell carcinomas. *Mol Biol Rep.* 2012; 39: 1267-74.
  27. Falsey RR, Marron MT, Gunaherath GM, Geng YH, Zheng ST, Liu T, Sheyhidin I, Lu XM. Actin microfilament aggregation induced by withaferin A is mediated by annexin II. *Nat Chem Biol.* 2006; 2: 33-38.
  28. Fatimathas L, Moss SE. Annexins as disease modifiers. *Histol Histopathol.* 2010; 25: 527-32.
  29. Gozgit JM, Pentecost BT, Marconi SA, Otis CN, Wu C, Arcaro KF. Use of an aggressive MCF-7 cell line variant, TMX2-28, to study cell invasion in breast cancer. *Mol Cancer Res.* 2006; 4: 905-13.
  30. Shen Z, Ye Y, Kauttu T, Seppänen H, Vainionpää S, Wang S, Mustonen H, Puolakkainen P. Novel focal adhesion protein kindlin-2 promotes the invasion of gastric cancer cells through phosphorylation of integrin  $\beta 1$  and  $\beta 3$ . *J Surg Oncol.* 2013; 108: 106-12.
  31. Kato K, Shiozawa T, Mitsushita J, Toda A, Horiuchi A, Nikaido T, Fujii S, Konishi I. Expression of the mitogen-inducible gene-2 (mig-2) is elevated in human uterine leiomyomas but not in leiomyosarcomas. *Hum Pathol.* 2004; 35: 55-60.
  32. Shi X, Wu C. A suppressive role of mitogen inducible gene-2 in mesenchymal cancer cell invasion. *Mol Cancer Res.* 2008; 6(5): 715-24.
  33. Gong X, An Z, Wang Y, Guan L, Fang W, Strömblad S, Jiang Y, Zhang H. Kindlin-2 controls sensitivity of prostate cancer cells to cisplatin-induced cell death. *Cancer Lett.* 2010; 299: 54-62.
  34. Derycke L, Stove C, Vercoutter-Edouart AS, De Wever O, Dollé L, Colpaert N, Depypere H, Michalski JC, Bracke M. The role of non-muscle myosin IIA in aggregation and

- invasion of human MCF-7 breast cancer cells. *Int J Dev Biol.* 2011; 55: 835-40.
35. Liang S, He L, Zhao X, Miao Y, Gu Y, Guo C, Xue Z, Dou W, Hu F, Wu K, Nie Y, Fan D. MicroRNA let-7f inhibits tumor invasion and metastasis by targeting MYH9 in human gastric cancer. *PLoS One.* 2011; 6: e18409.
  36. Xia ZK, Yuan YC, Yin N, Yin BL, Tan ZP, Hu YR. Nonmuscle myosin IIA is associated with poor prognosis of esophageal squamous cancer. *Dis Esophagus.* 2012; 25: 427-36.
  37. Zhang FR, Tao LH, Shen ZY, Lv Z, Xu LY, Li EM. Fascin expression in human embryonic, fetal, and normal adult tissue. *J Histochem Cytochem.* 2008; 56: 193-99.
  38. Zhao Q, Shen JH, Shen ZY, Wu ZY, Xu XE, Xie JJ, Wu JY, Huang Q, Lu XF, Li EM, Xu LY. Phosphorylation of Fascin Decreases the Risk of Poor Survival in Patients With Esophageal Squamous Cell Carcinoma. *J Histochem Cytochem.* 2010; 58: 979-88.
  39. Sun LL, Sun XX, Xu XE, Zhu MX, Wu ZY, Shen JH, Wu JY, Huang Q, Li EM, Xu LY. Overexpression of Jumonji AT-rich interactive domain 1B and PHD finger protein 2 is involved in the progression of esophageal squamous cell carcinoma. *Acta Histochem.* 2013; 115: 56-62.
  40. Xu QX, Li EM, Zhang YF, Liao LD, Xu XE, Wu ZY, Shen JH, Xu LY. Overexpression of sigmal receptor and its positive associations with pathologic TNM classification in esophageal squamous cell carcinoma. *J Histochem Cytochem.* 2012; 60: 457-66.
  41. Alldridge L, Metodieva G, Greenwood C, Al-Janabi K, Thwaites L, Sauven P, Metodiev M. Proteome profiling of breast tumors by gel electrophoresis and nanoscale electrospray ionization mass spectrometry. *J Proteome Res.* 2008; 7: 1458-69.
  42. Yang XR, Xu Y, Yu B, Zhou J, Qiu SJ, Shi GM, Zhang BH, Wu WZ, Shi YH, Wu B, Yang GH, Ji Y, Fan J. High expression levels of putative hepatic stem/progenitor cell biomarkers related to tumour angiogenesis and poor prognosis of hepatocellular carcinoma. *Gut.* 2010; 59: 953-62.
  43. Kadara H, Behrens C, Yuan P, Solis L, Liu D, Gu X, Minna JD, Lee JJ, Kim E, Hong WK, Wistuba II, Lotan R. A Five-Gene and Corresponding Protein Signature for Stage-I Lung Adenocarcinoma Prognosis. *Clin Cancer Res.* 2011; 17: 1490-01.
  44. Garcia I, Mayol G, Ríos J, et al. A Three-Gene Expression Signature Model for Risk Stratification of Patients with Neuroblastoma. *Clin Cancer Res.* 2012; 18: 2012-23.
